# Supplementary material for: Targeting arginase-II protects mice from high-fat-diet-induced hepatic steatosis through suppression of macrophage inflammation
Source: PubMed Central journal article supplement (PMC4742779; doi:10.1038/srep20405), 2016-02-05
Supplement: srep20405-s1.pdf [file srep20405-s1.pdf]

**Targeting arginase-II protects mice from high-fat-diet-induced hepatic steatosis  
through suppression of macrophage inflammation**

Chang Liu<sup>1</sup>, Angana G. Rajapakse<sup>1</sup>, Erwin Riedo<sup>2</sup>, Benoit Fellay<sup>2</sup>, Marie-Claire  
Bernhard<sup>3</sup>, Jean-Pierre Montani<sup>1,4</sup>, Zhihong Yang<sup>1,4\*</sup> and Xiu-Fen Ming<sup>1,4\*</sup>

<sup>1</sup>Vascular Biology, Department of Medicine, Division of Physiology, University of Fribourg,  
Chemin du Musée 5, CH-1700 Fribourg, Switzerland

<sup>2</sup>Laboratory HFR, Hospital Fribourgeois, Chemin des Pensionnats 2, 1708 Fribourg,  
Switzerland

<sup>3</sup>Promed Medical Laboratory SA, Fribourg, Switzerland

<sup>4</sup>National Center of Competence in Research “Kidney.CH”, Switzerland

*Address for correspondence:*

Zhihong Yang, MD or  
Xiu-Fen Ming, MD, PhD  
Laboratory of Vascular Biology  
Department of Medicine  
Division of Physiology  
University of Fribourg  
Chemin du Musée 5  
CH-1700, Fribourg  
Switzerland  
Tel: 0041-26-300 85 93  
Fax: 0041-26-300 97 34  
Email: [zhihong.yang@unifr.ch](mailto:zhihong.yang@unifr.ch)  
or [xiu-fen.ming@unifr.ch](mailto:xiu-fen.ming@unifr.ch)

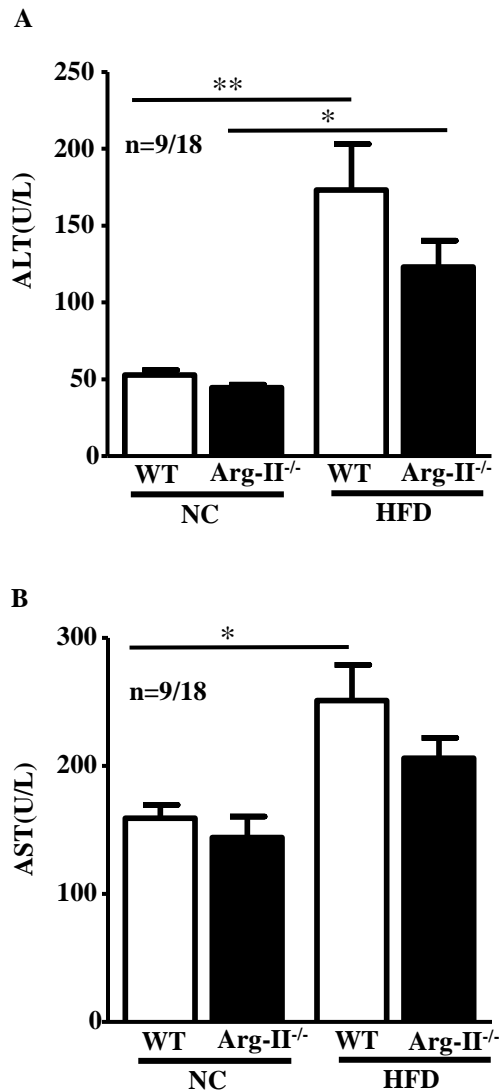

**Fig. S1. The increase in plasma ALT and AST tends to be smaller in obese Arg-II<sup>-/-</sup> mice as compared to obese WT mice, but does not reach statistical significance.** Liver injury was assessed by measuring plasma ALT (A) and AST (B). n=9 (NC) and n=18 (HFD).

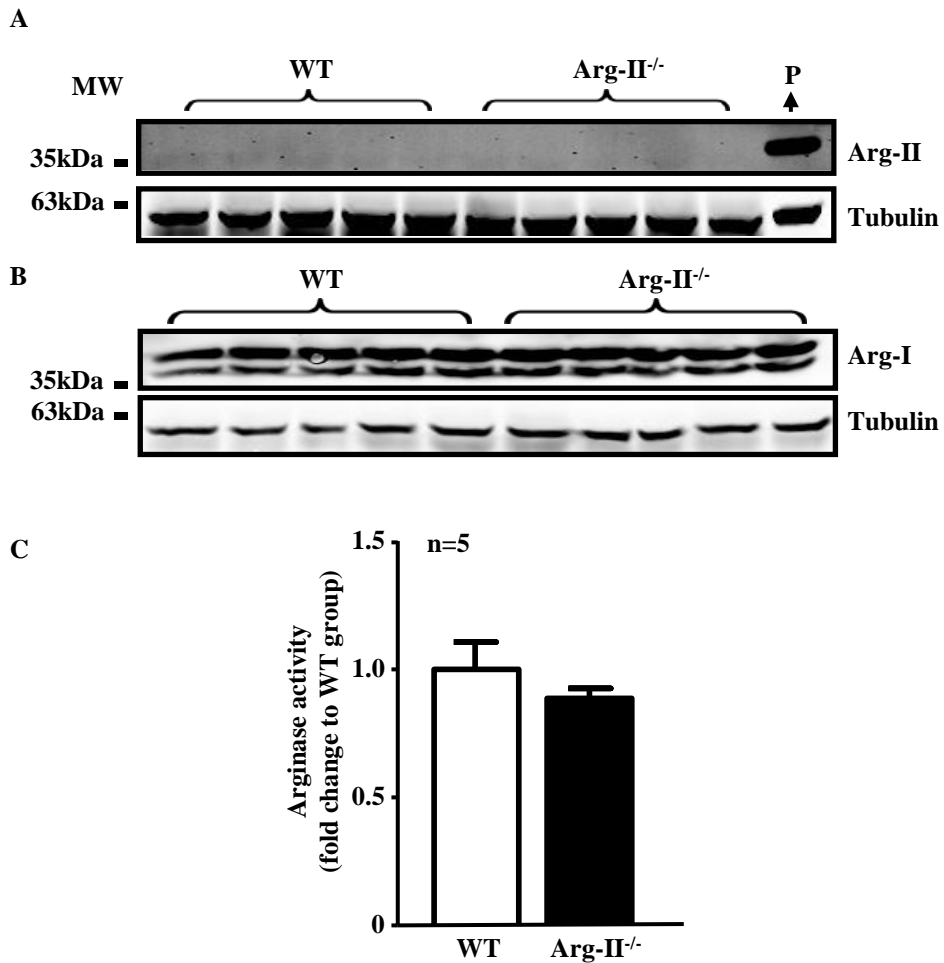

**Fig. S2. Arg-II is not detectable in liver lysates, whereas Arg-I expression and total arginase activity in liver of obese mice are not significantly affected by Arg-II-deficiency.** Liver lysates from obese WT and Arg-II<sup>-/-</sup> mice were prepared and subjected to immunoblotting analysis of **(A)** Arg-II expression. Mice kidney lysate was used as positive control (P). **(B)** Arg-I expression. Tubulin served as loading control. **(C)** Arginase activity assay.

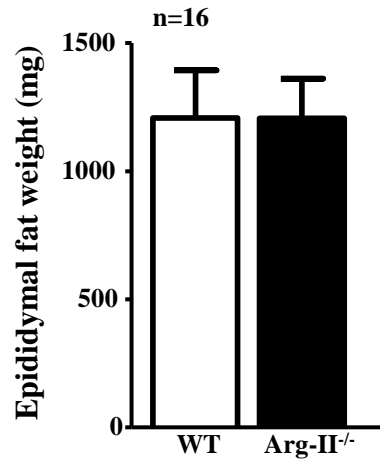

**Fig. S3.** There is no significant difference in epididymal fat weight between wt and Arg-II<sup>-/-</sup> mice fed HFD.

A.

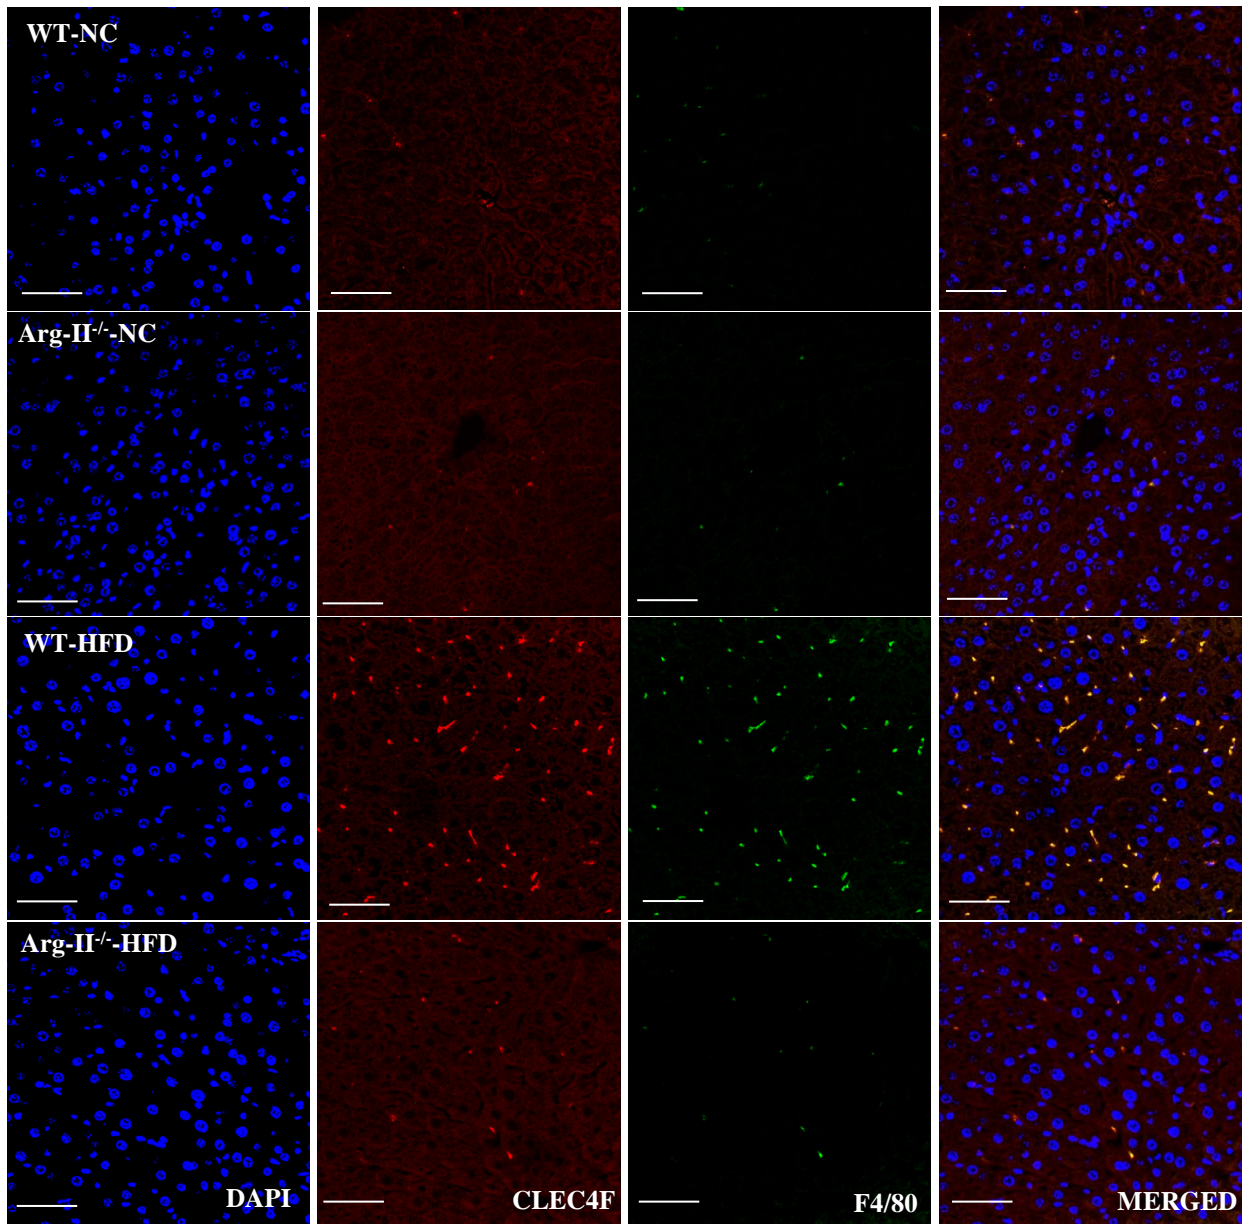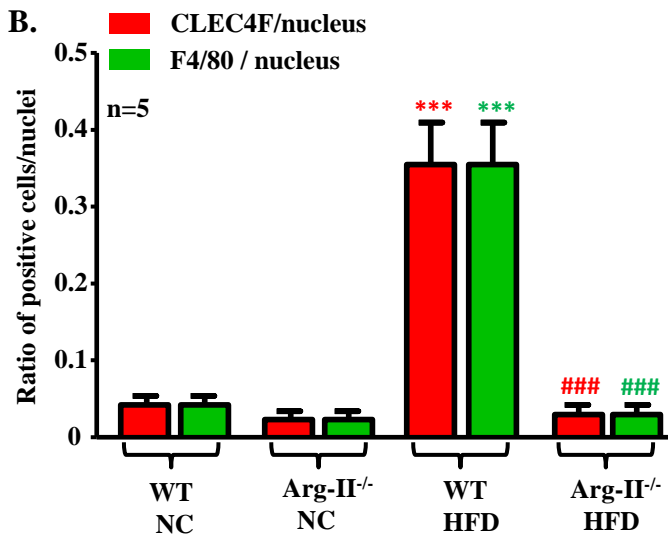

**Fig. S4. All the macrophages in liver are Kupffer cells.** (A) Liver sections from WT and Arg-II<sup>-/-</sup> mice fed NC or HFD were stained with pan-macrophage marker F4/80 (green) and Kupffer cell specific marker CLEC4F (red) followed by nuclei counterstaining with DAPI (blue). (B) Quantification of the fluorescence signals.
